# Supplementary material for: Bronchial airway gene expression in smokers with lung or head and neck cancer
Source: PubMed Central journal article supplement (PMC3987082; doi:10.1002/cam4.190), 2014-02-04
Supplement: cam40003-0322-sd1.pdf [file cam40003-0322-sd1.pdf]

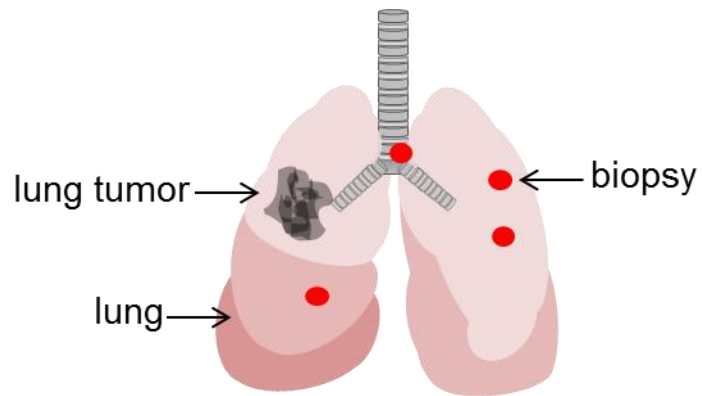

**Figure S1.** Scheme illustrating the sites where benign lung biopsies were taken for the analysis of the smoking-related molecular field of injury of the lung and airway in patients with NSCLC. See text for additional details.

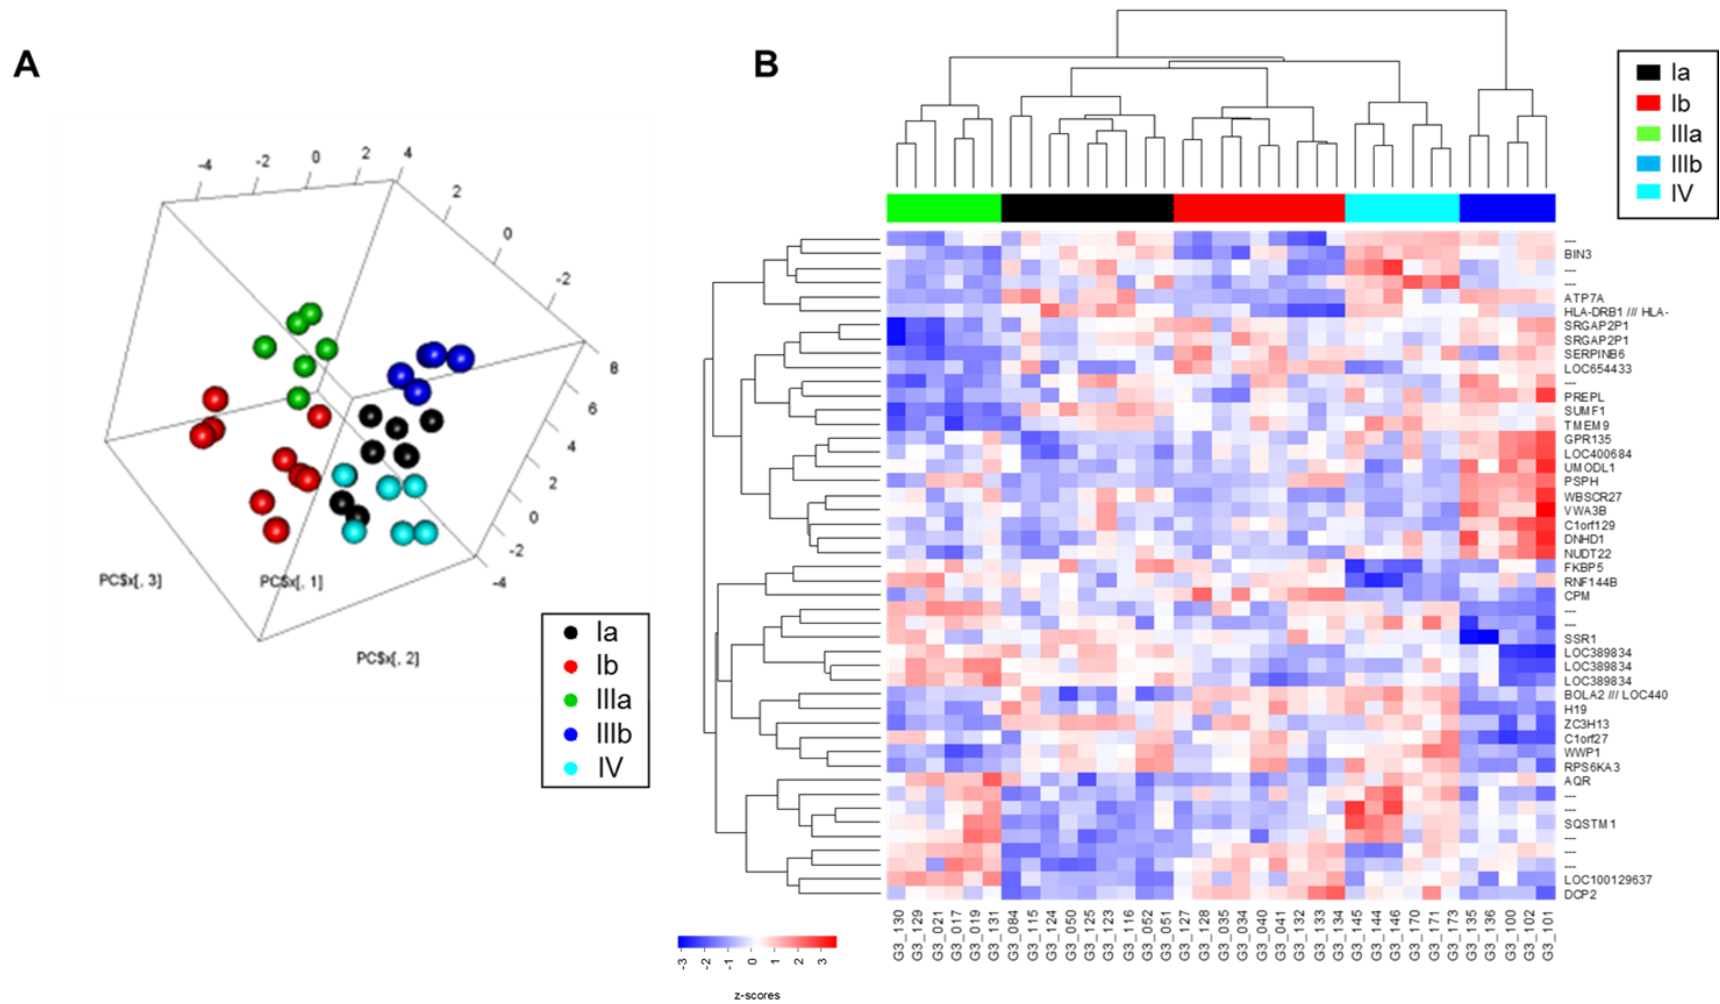

**Figure S2. Genes differentially expressed amongst the 5 cancer stages of the SC biopsies. (A)** 3-dimensional representation of the principal component analysis showing segregation of the 37 SC biopsies based on the 47 DEGs. **(B)** Hierarchical clustering of SC biopsies based on the 47 DEGs. See text for details.

**A****SNC vs NS**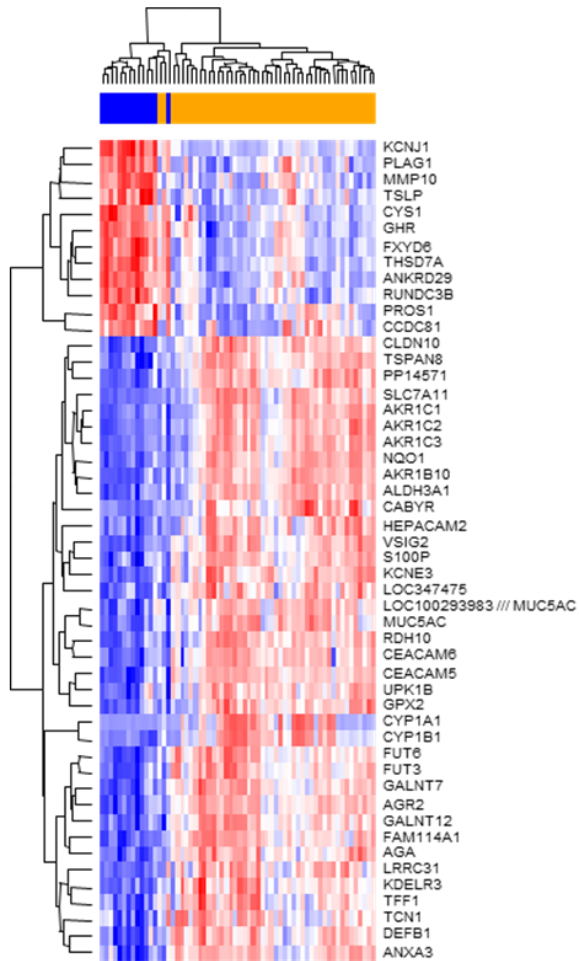**B****SC vs NS**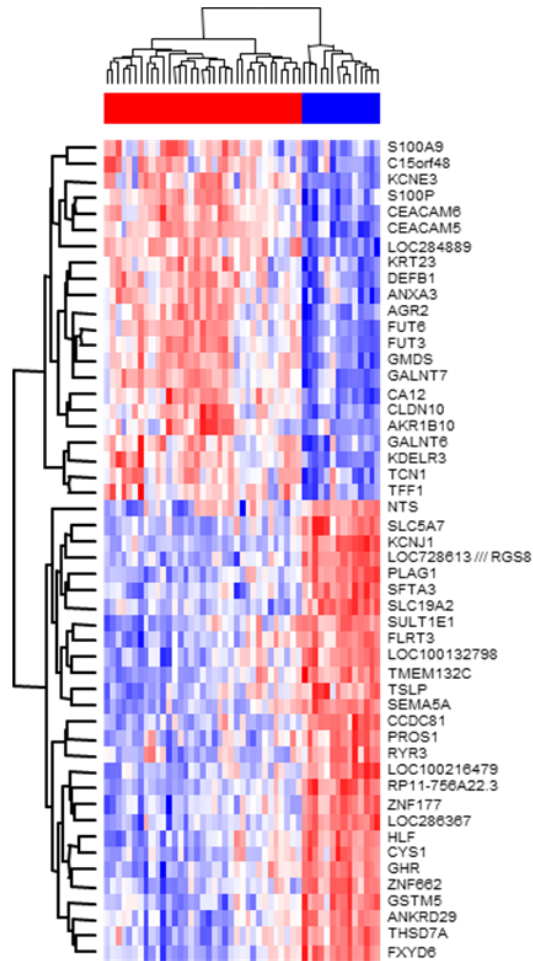**C****SC vs SNC**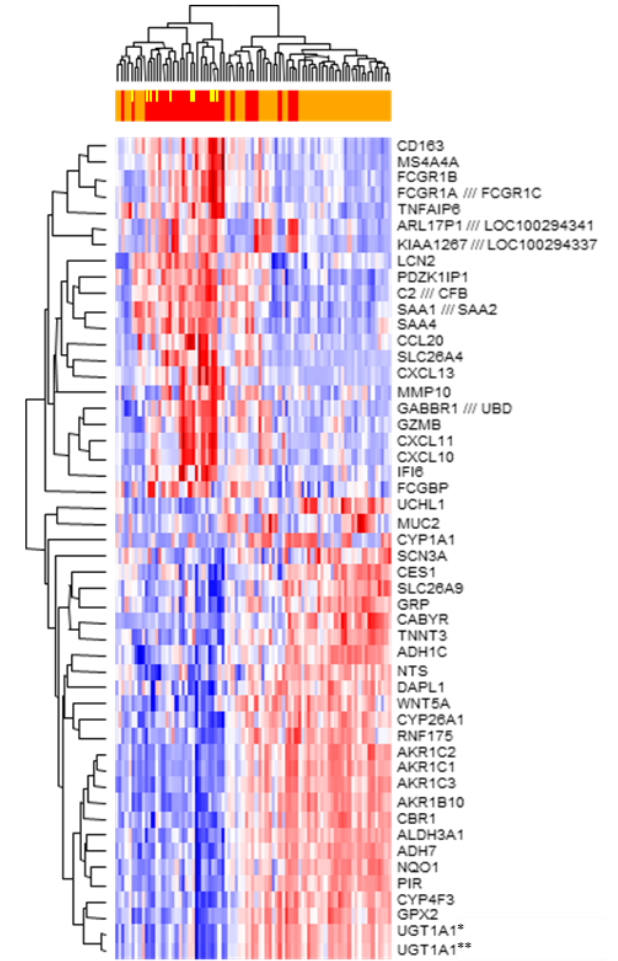

\* UGT1A1 /// UGT1A10 /// UGT1A3 /// UGT1A4 /// UGT1A5 /// UGT1A6 /// UGT1A7 /// UGT1A8 /// UGT1A9  
 \*\* UGT1A1 /// UGT1A10 /// UGT1A4 /// UGT1A6 /// UGT1A8 /// UGT1A9

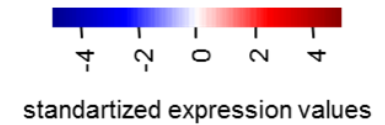

**Figure S3.** Hierarchical clustering and heatmap representation of the top 50 genes differentially expressed in the indicated comparisons of SNC vs NS, SC vs NS and SC vs SNC. The color codes for the groups and the color-coded scale (blue = downregulation, red=upregulation) for the standardised expression values are indicated, respectively, at the top and the bottom of the figure. HNC biopsies on the rightmost heatmap are indicated by bars.

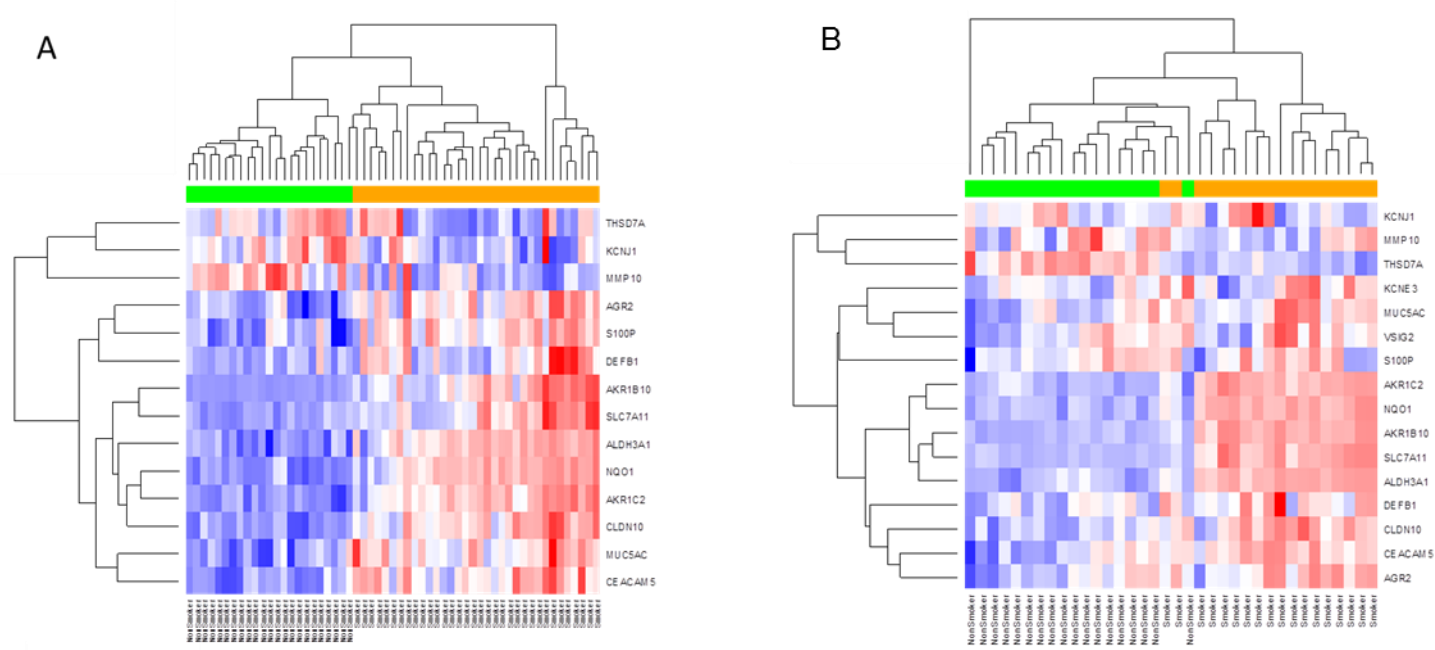

**Figure S4.** Validation of the 16-gene signature that distinguishes SNC and NS, on two independent datasets. Heatmaps for the signature on the datasets of **(A)** Spira et al. [10] and **(B)** Amous et al. [28]. See text for details.

# A

| Gene Signature*      | Signature Name                    | Description                                                                                                                                                | Reference | Size | Overlap | P-value |
|----------------------|-----------------------------------|------------------------------------------------------------------------------------------------------------------------------------------------------------|-----------|------|---------|---------|
| 17115125-SuppTable2  | Lung_not_cancer_Harvey06_152genes | Genes differentially expressed in the small airway epithelium of 6 healthy smokers vs 5 healthy non-smokers                                                | 1         | 125  | 9       | 0       |
| 17115125-SuppTable4  | Lung_not_cancer_Harvey06_118genes | Genes differentially expressed in the small airway epithelium of 10 healthy smokers vs 12 healthy non-smokers                                              | 1         | 91   | 7       | 0       |
| 16912175-SuppTable3b | HeadandNeck_Sengupta06_429genes   | Genes whose expression is down-regulated in nasopharyngeal carcinoma tumors vs normal tissues                                                              | 2         | 356  | 4       | 0       |
| 19334046-TableS3a    | Lung_Boelens09_111genes           | Up-regulated genes in normal bronchial epithelium as compared to ex-smokers                                                                                | 3         | 97   | 4       | 0       |
| 20332630-Table4      | Lung_not_cancer_Crul10_25genes_up | Top 25 of the most highly up-regulated genes between COPD patients with acute exacerbation vs stable COPD patients                                         | 4         | 23   | 3       | 0       |
| 15735009-Table1      | Lung_Mahadevan05_18genes          | Altered gene expression patterns in MCF-7 cells induced by the urban dust particulate complex mixture standard reference material 1649a.                   | 5         | 18   | 2       | 0       |
| 17108109-Table2a     | Lung_not_cancer_Carolan06_11genes | Microarray assessment of neuroendocrine cell-specific genes in normal nonsmokers normal smokers, smokers with early COPD and smokers with established COPD | 6         | 10   | 2       | 0       |
| 14676830-Table3      | HeadandNeck_Cromer04_55genes      | Sequences decreased in tumours of the hypopharynx (55 genes, 12 of which were decreased sequences in common with previous studies)                         | 7         | 51   | 2       | 0.0001  |
| 20421987-TableS5     | Lung_Hou10_75genes                | NSCLC histology signature (short)                                                                                                                          | 8         | 58   | 2       | 0.0001  |
| 20035825-TableS7a    | Lung_Mikkonen10_416genes          | Up-regulated genes in A549 cells treated with 1 $\mu$ M Dexamethasone or vehicle for 24h.                                                                  | 9         | 325  | 3       | 0.0003  |
| 20421987-TableS4     | Lung_Hou10_518genes               | NSCLC histology signature (long)                                                                                                                           | 8         | 404  | 3       | 0.0006  |
| 16715129-SuppTable5  | HeadandNeck_Jarvinen06_223genes   | Statistically identified genes whose expression was decreased due to copy number losses in the primary tumors.                                             | 10        | 213  | 2       | 0.0031  |
| 16489042-SuppTable1a | HeadandNeck_Roepman06_396genes    | Predictive genes showing negative correlation with lymph node metastasis                                                                                   | 11        | 318  | 2       | 0.0109  |



**Figure S5. (A)** The 13 published lung and head and neck gene-signatures displaying a significant enrichment in the genes composing the 15-gene signature that distinguishes between SC and SNC. Analysis was carried out using the GeneSigDB interface: Results of the enrichment test were filtered based on the corrected P-value ( $<0.05$ ), gene overlap  $>1$  (number of genes shared by each signature and the signature identified in this study) and relevance to lung and head and neck. The size of each gene-signature is indicated, as well as the gene overlap. Note that the numbers in the gene-signature column refer to the PubMed index of each reference. **(B)**. Heatmap representation of the presence (red square) or absence (grey square) of each gene composing the signature identified in this study, within the 18 gene-signatures identified in (A). See text for discussion.

#### References:

1. Harvey BG, Heguy A, Leopold PL, Carolan BJ, Ferris B, Crystal RG. Modification of gene expression of the small airway epithelium in response to cigarette smoking. *Journal of molecular medicine* 2007;85: 39-53.
2. Sengupta S, den Boon JA, Chen IH, Newton MA, Dahl DB, Chen M, Cheng YJ, Westra WH, Chen CJ, Hildesheim A, Sugden B, Ahlquist P. Genome-wide expression profiling reveals EBV-associated inhibition of MHC class I expression in nasopharyngeal carcinoma. *Cancer Res* 2006;66: 7999-8006.
3. Boelens MC, van den Berg A, Fehrmann RS, Geerlings M, de Jong WK, te Meerman GJ, Sietsma H, Timens W, Postma DS, Groen HJ. Current smoking-specific gene expression signature in normal bronchial epithelium is enhanced in squamous cell lung cancer. *J Pathol* 2009;218: 182-91.
4. Crul T, Testelmans D, Spruit MA, Troosters T, Gosselink R, Geeraerts I, Decramer M, Gayan-Ramirez G. Gene expression profiling in vastus lateralis muscle during an acute exacerbation of COPD. *Cellular physiology and biochemistry : international journal of experimental cellular physiology, biochemistry, and pharmacology* 2010;25: 491-500.
5. Mahadevan B, Keshava C, Musafia-Jeknic T, Pecaj A, Weston A, Baird WM. Altered gene expression patterns in MCF-7 cells induced by the urban dust particulate complex mixture standard reference material 1649a. *Cancer Res* 2005;65: 1251-8.
6. Carolan BJ, Heguy A, Harvey BG, Leopold PL, Ferris B, Crystal RG. Up-regulation of expression of the ubiquitin carboxyl-terminal hydrolase L1 gene in human airway epithelium of cigarette smokers. *Cancer Res* 2006;66: 10729-40.
7. Cromer A, Carles A, Millon R, Ganguli G, Chalmel F, Lemaire F, Young J, Dembele D, Thibault C, Muller D, Poch O, Abecassis J, et al. Identification of genes associated with tumorigenesis and metastatic potential of hypopharyngeal cancer by microarray analysis. *Oncogene* 2004;23: 2484-98.
8. Hou J, Aerts J, den Hamer B, van Ijcken W, den Bakker M, Riegman P, van der Leest C, van der Spek P, Foekens JA, Hoogsteden HC, Grosveld F, Philipsen S. Gene expression-based classification of non-small cell lung carcinomas and survival prediction. *PLoS One* 2010;5: e10312.
9. Mikkonen L, Pihlajamaa P, Sahu B, Zhang FP, Janne OA. Androgen receptor and androgen-dependent gene expression in lung. *Molecular and cellular endocrinology* 2010;317: 14-24.
10. Jarvinen AK, Autio R, Haapa-Paananen S, Wolf M, Saarela M, Grenman R, Leivo I, Kallioniemi O, Makitie AA, Monni O. Identification of target genes in laryngeal squamous cell carcinoma by high-resolution copy number and gene expression microarray analyses. *Oncogene* 2006;25: 6997-7008.
11. Roepman P, Kemmeren P, Wessels LF, Slootweg PJ, Holstege FC. Multiple robust signatures for detecting lymph node metastasis in head and neck cancer. *Cancer Res* 2006;66: 2361-6.
